# Supplementary material
Source: PubMed Central journal article supplement (PMC6589543)

Figure 1

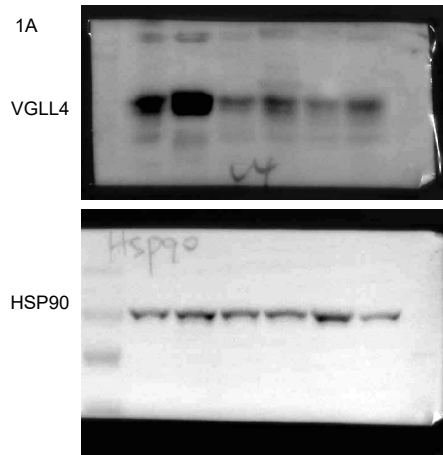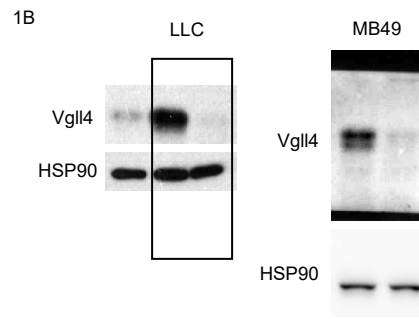

Supplement: EMBJ-38-e99506-s007.pdf [file EMBJ-38-e99506-s007.pdf]

Figure 2

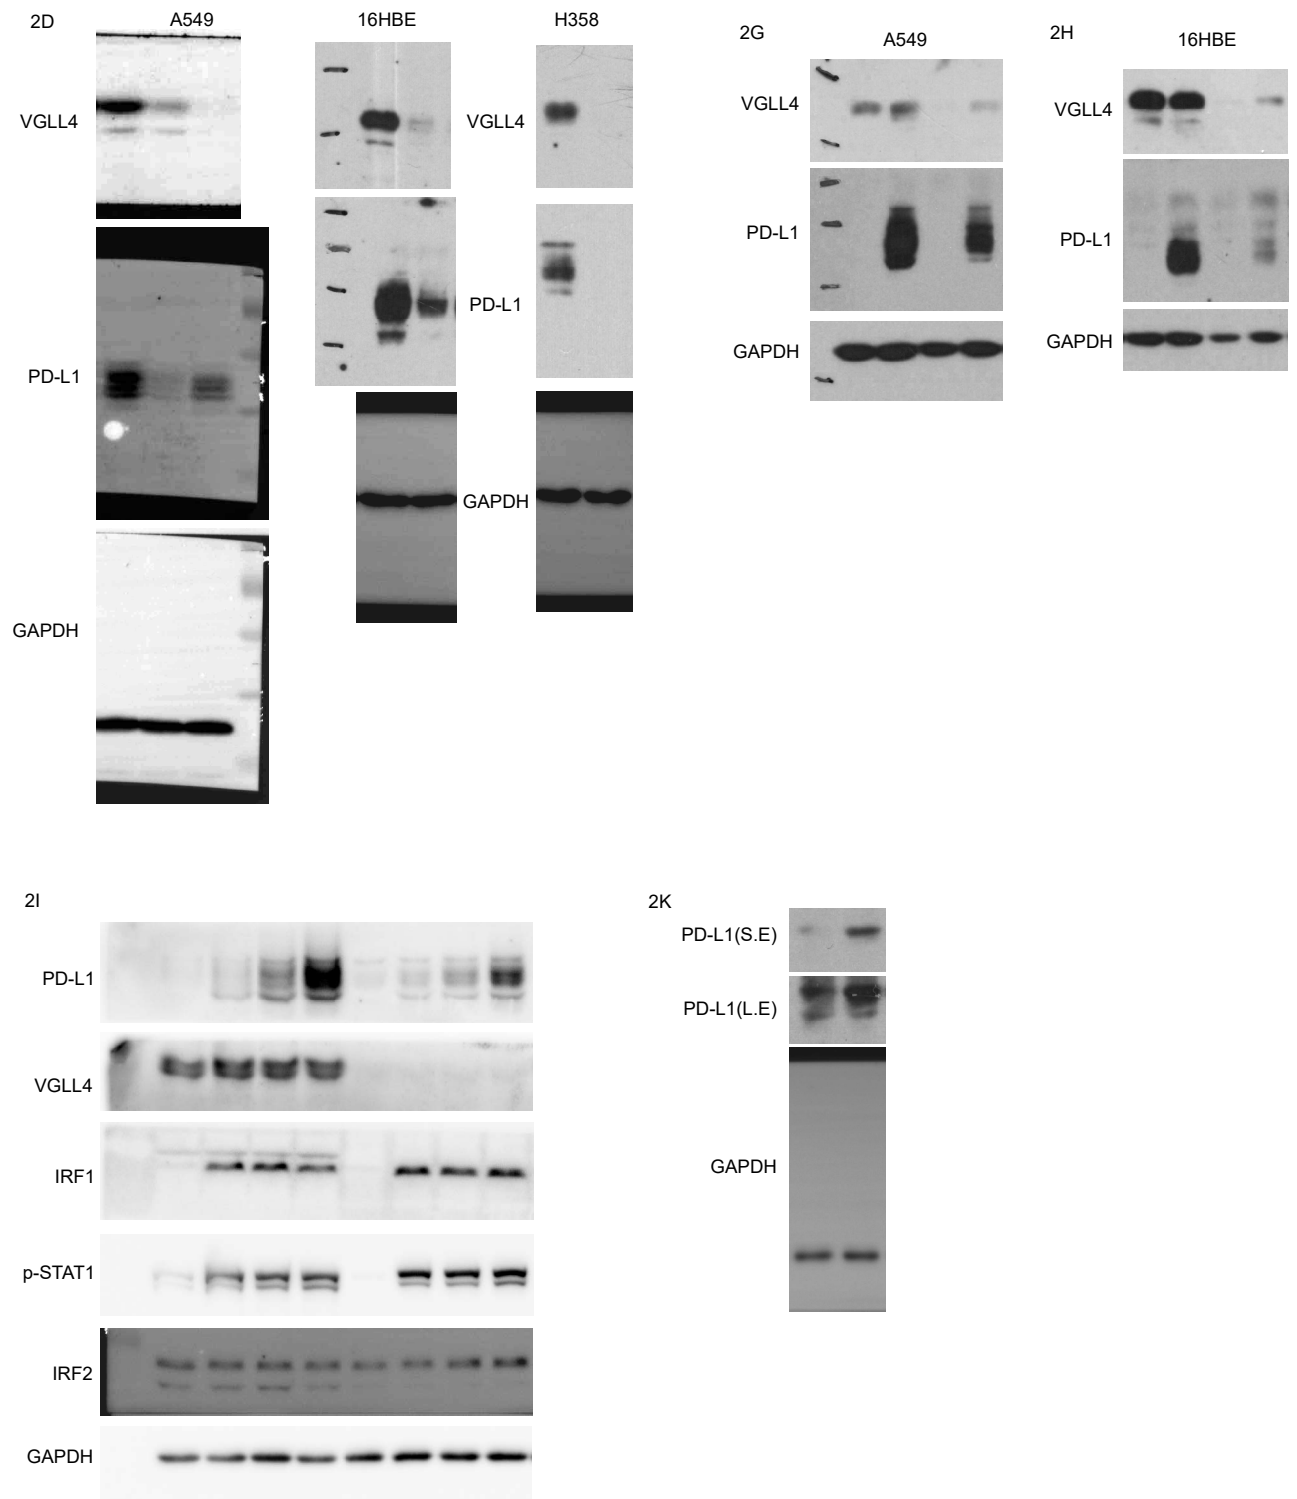

Supplement: EMBJ-38-e99506-s008.pdf [file EMBJ-38-e99506-s008.pdf]

Figure 3

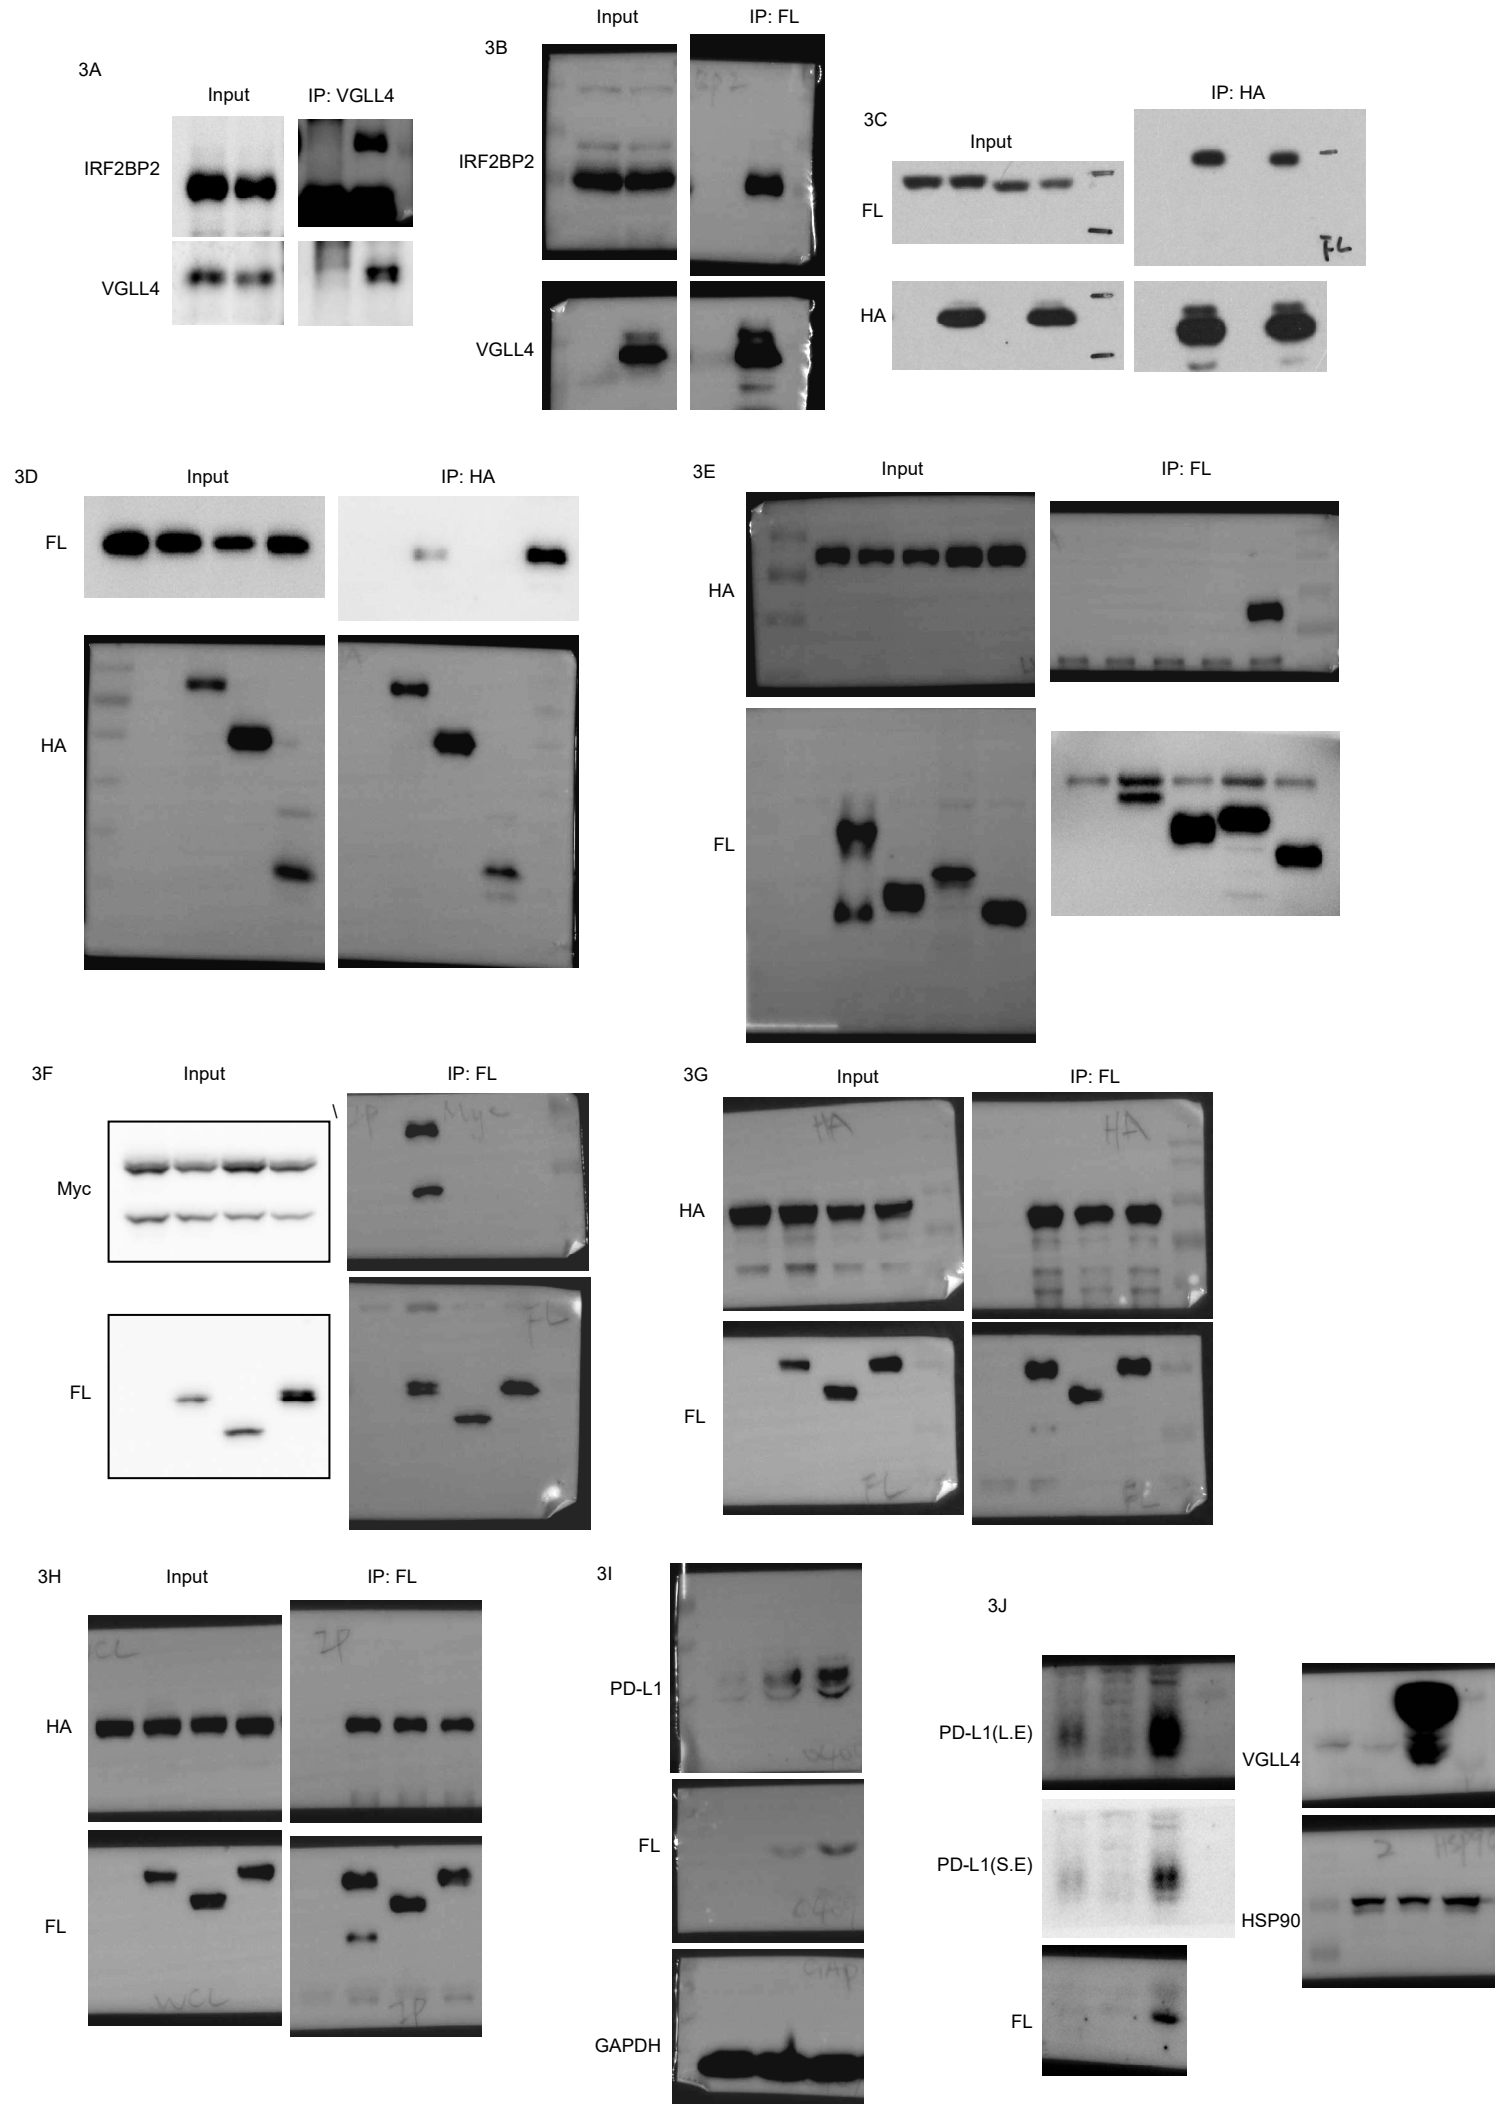

Supplement: EMBJ-38-e99506-s009.pdf [file EMBJ-38-e99506-s009.pdf]

Figure 4

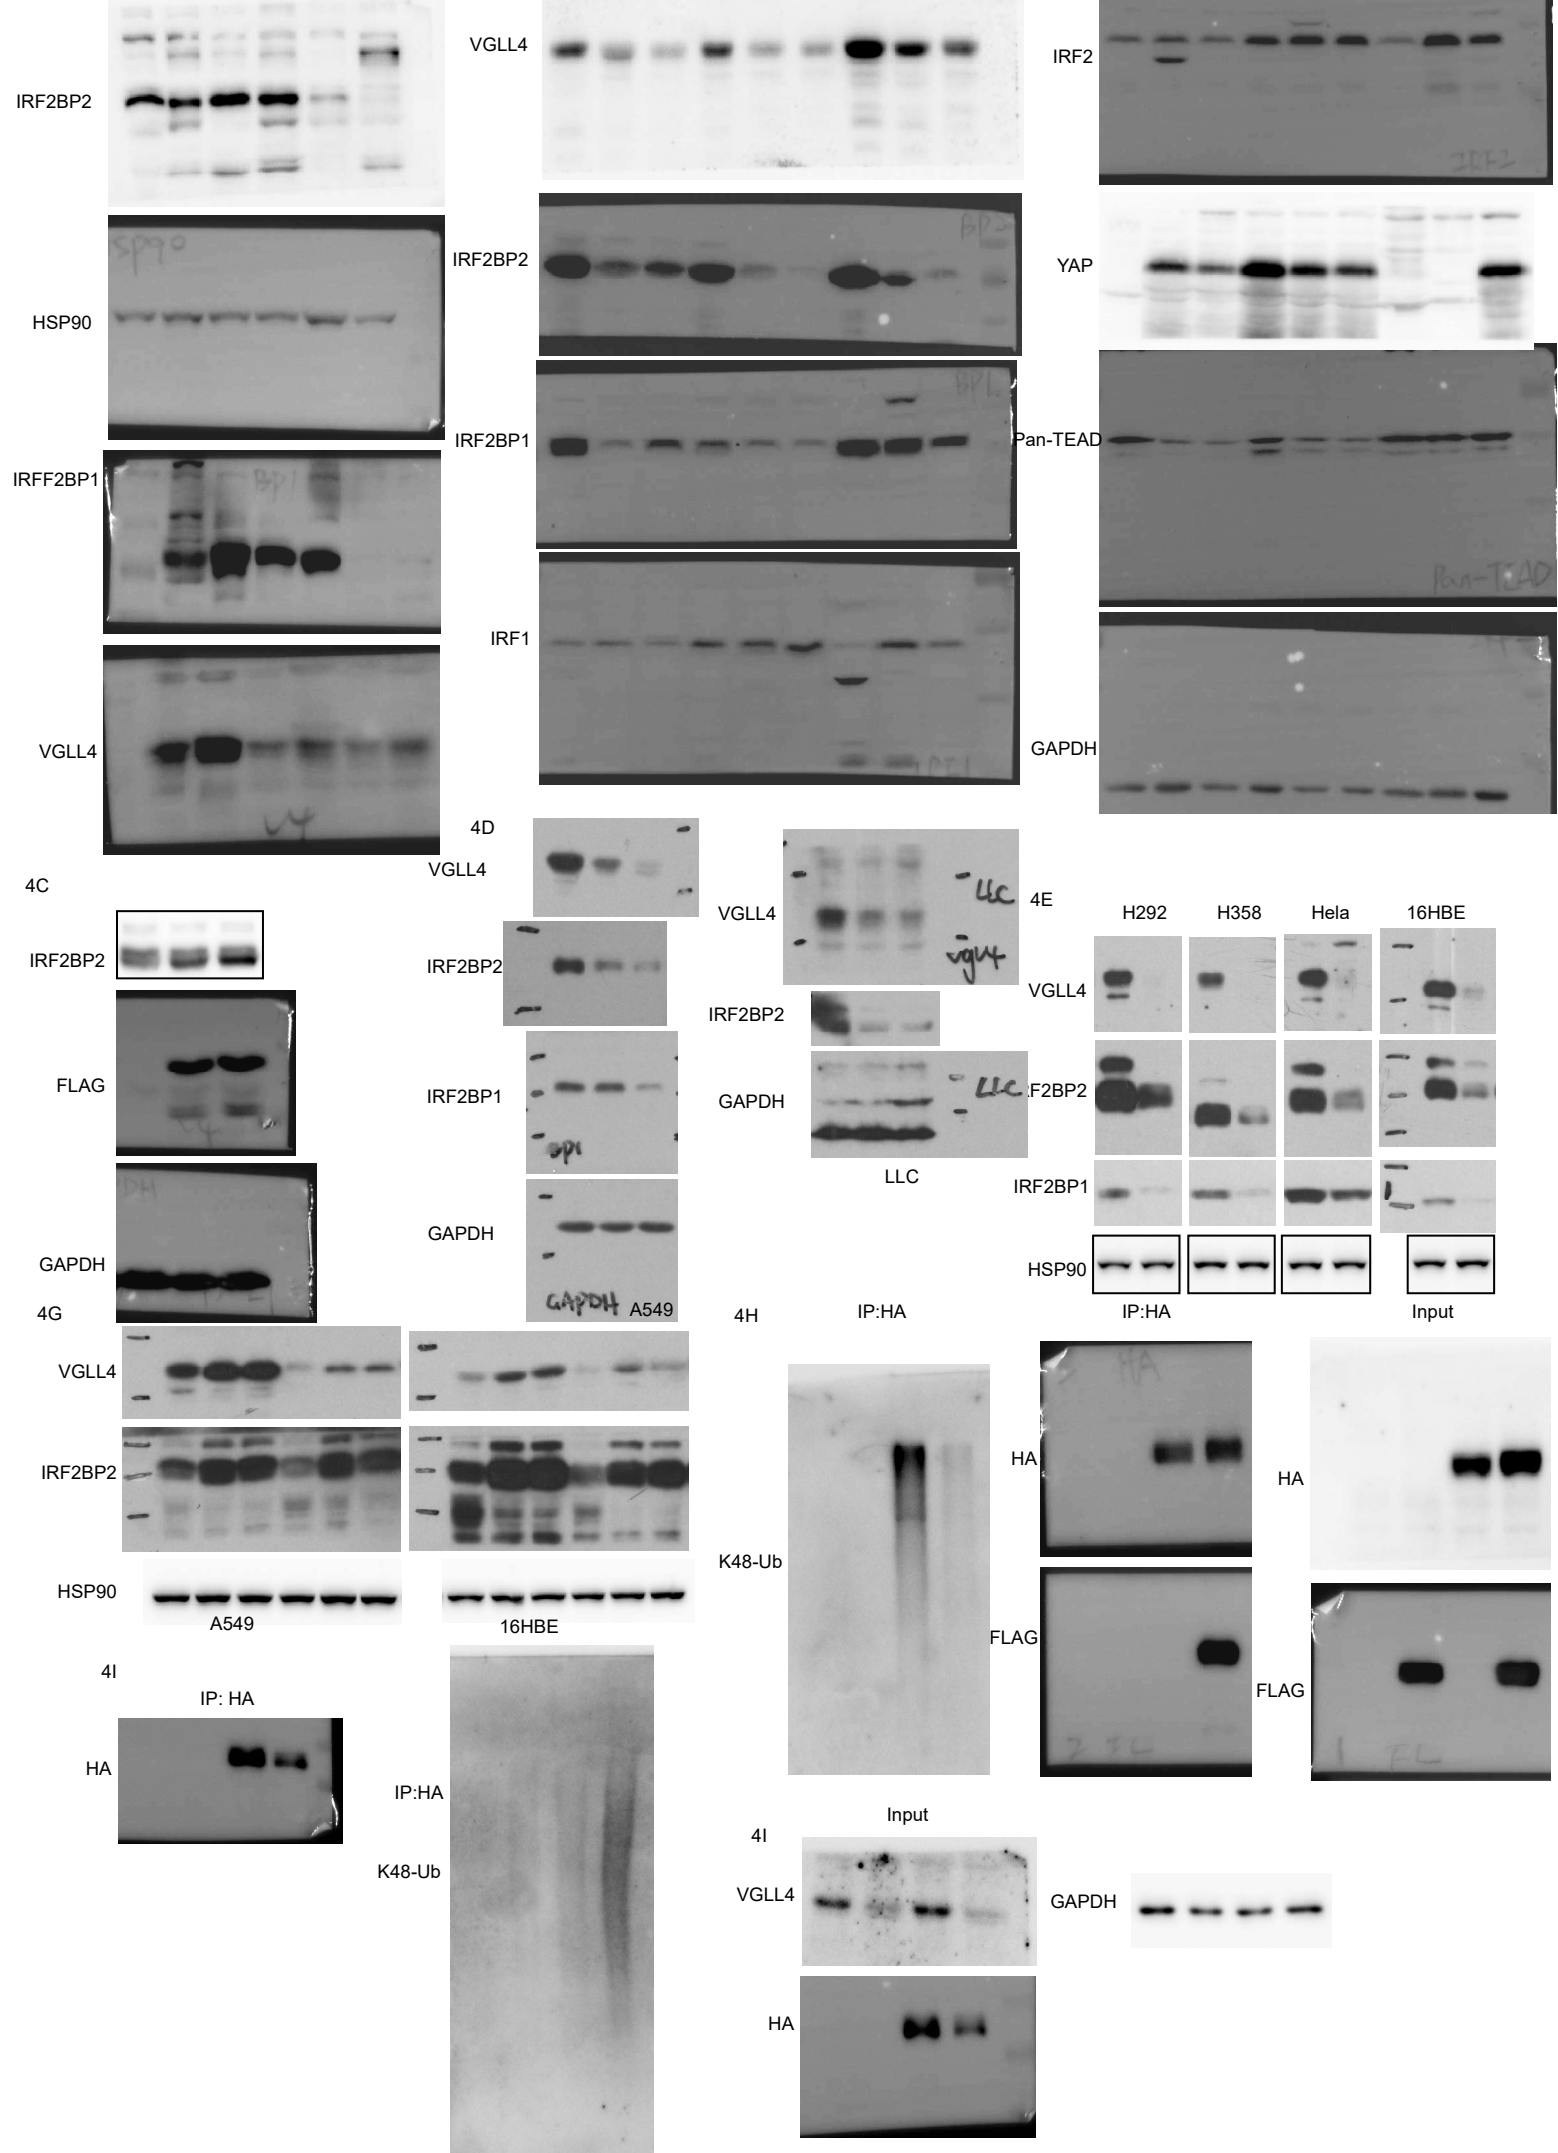

Supplement: EMBJ-38-e99506-s010.pdf [file EMBJ-38-e99506-s010.pdf]

Figure 5

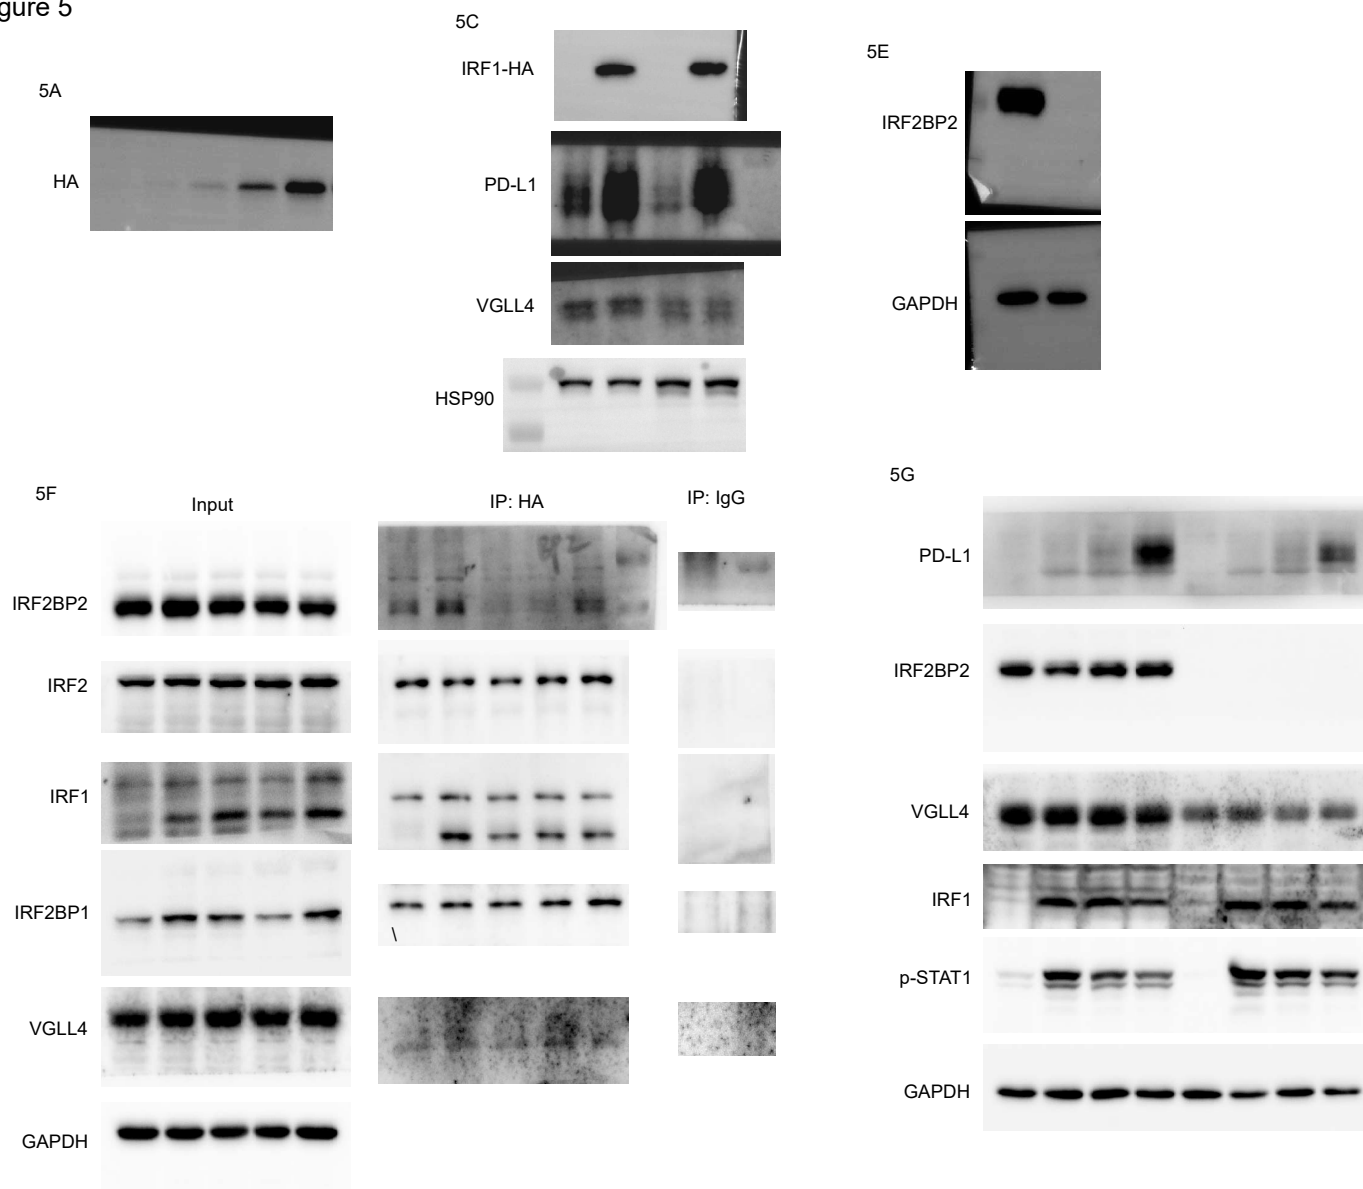

Supplement: EMBJ-38-e99506-s011.pdf [file EMBJ-38-e99506-s011.pdf]

Figure 6

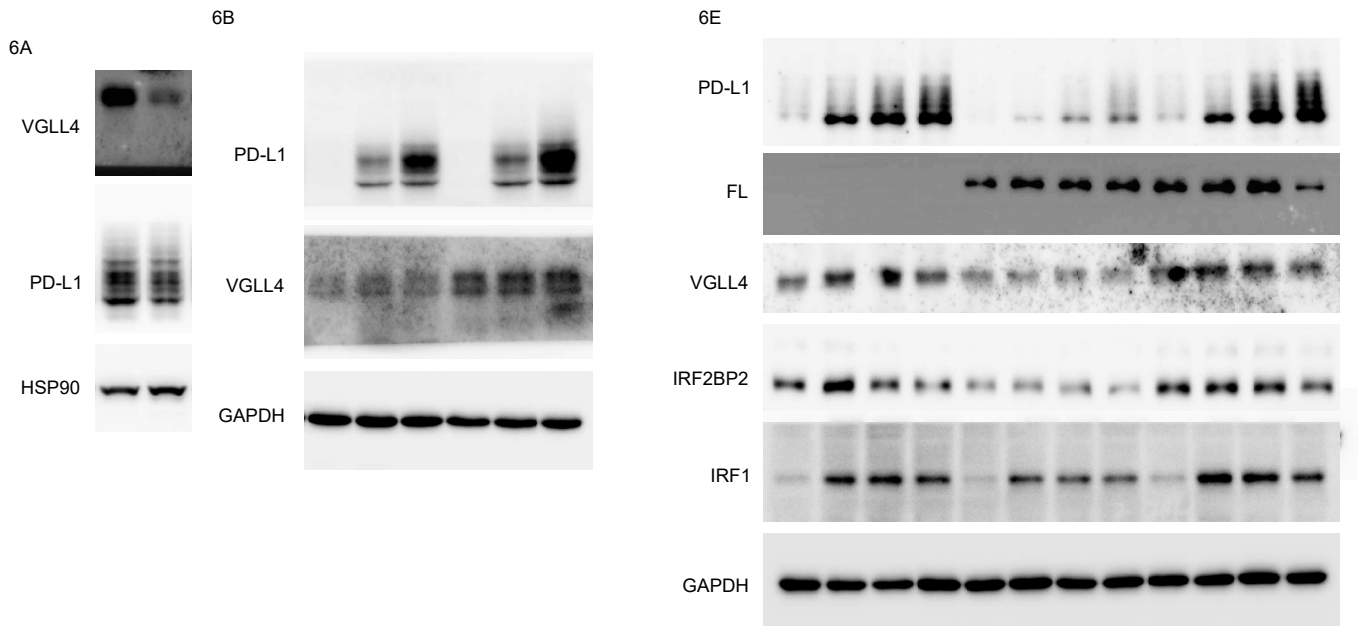

Supplement: EMBJ-38-e99506-s012.pdf [file EMBJ-38-e99506-s012.pdf]
